# Supplementary material
Source: PubMed Central journal article supplement (PMC4594059)
Supplement: CJN.01090115_CJN01090115SupplementaryData.pdf [file CJN.01090115_CJN01090115SupplementaryData.pdf]

**Supplemental Table 1: Bacterial Infection International Classification of Diseases, Ninth Revision, Clinical Modification (ICD-9-CM) Codes Grouped by Infected Organ System and Intravenous Iron Healthcare Common Procedure Coding System (HCPCS) Codes**

| <b>Infected Organ System</b> | <b>Bacterial Infection ICD-9-CM Codes</b>                                                                                                                                                                                                                                                                                                                                                                                                                         |
|------------------------------|-------------------------------------------------------------------------------------------------------------------------------------------------------------------------------------------------------------------------------------------------------------------------------------------------------------------------------------------------------------------------------------------------------------------------------------------------------------------|
| Cardiovascular               | 421.0, 421.9, 996.61                                                                                                                                                                                                                                                                                                                                                                                                                                              |
| Catheter/graft               | 996.62, 999.31                                                                                                                                                                                                                                                                                                                                                                                                                                                    |
| Central nervous system       | 036.1, 094.9, 320.1, 320.2, 320.3, 320.82, 320.89, 320.9, 322.9, 324.0, 324.1, 324.9, 996.63                                                                                                                                                                                                                                                                                                                                                                      |
| Ear, nose throat/dental      | 360.00, 360.01, 372.00, 372.20, 372.30, 373.13, 375.32, 376.01, 380.03, 380.10, 380.14, 382.00, 382.01, 382.4, 382.9, 383.00, 383.02, 461.0, 461.1, 461.2, 461.3, 461.8, 461.9, 462, 463, 464.00, 475, 478.22, 478.24, 522.5, 523.31, 523.33, 527.3, 528.3                                                                                                                                                                                                        |
| Gastrointestinal/peritonitis | 003.0, 005.0, 005.2, 008.00, 008.09, 008.41, 008.42, 008.43, 008.44, 008.45, 008.46, 008.47, 008.49, 008.5, 009.0, 009.1, 009.2, 009.3, 014.01, 014.04, 040.2, 536.41, 540.0, 540.1, 540.9, 541, 542, 562.01, 562.03, 562.11, 562.13, 566, 567.21, 567.22, 567.23, 567.29, 567.38, 567.39, 567.82, 567.89, 567.9, 569.5, 569.61, 572.0, 572.1, 574.00, 574.01, 574.30, 574.31, 574.60, 574.61, 574.80, 574.81, 575.0, 575.4, 575.10, 575.12, 576.1, 577.0, 996.68 |
| Genitourinary                | 098.0, 099.53, 099.54, 590.10, 590.2, 590.3, 590.80, 590.9, 595.0, 595.81, 595.89, 595.9, 599.0, 601.0, 601.2, 601.3, 601.9, 639.0, 996.64, 996.65                                                                                                                                                                                                                                                                                                                |
| Joint/bone                   | 015.00, 015.04, 015.23, 711.00, 711.01, 711.02, 711.03, 711.04, 711.05, 711.06, 711.07, 711.08, 711.09, 711.91, 711.92, 711.93, 711.95, 711.97, 730.01, 730.02, 730.04, 730.05, 730.06, 730.07, 730.08, 730.20, 730.21, 730.22, 730.23, 730.24, 730.25, 730.26, 730.27, 730.28, 730.29, 730.96, 730.97, 996.66, 996.67                                                                                                                                            |
| Reproductive/breast          | 604.0, 604.90, 607.1, 614.0, 614.2, 614.3, 614.5, 614.9, 615.9, 616.0, 616.10, 616.4, 647.83, 647.84, 647.93                                                                                                                                                                                                                                                                                                                                                      |
| Respiratory/thoracic         | 003.22, 011.44, 011.45, 011.55, 011.90, 011.92, 011.93, 011.94, 011.95, 011.96, 012.00, 012.02, 012.06, 012.15, 031.0, 033.9, 034.0, 039.1, 464.10, 464.11, 464.30, 464.31, 464.50, 464.51, 466.0, 481, 482.0, 482.1, 482.2, 482.30, 482.31, 482.39, 482.40, 482.41, 482.42, 482.49, 482.81, 482.82, 482.83, 482.84, 482.89, 482.9, 483.0, 485, 490, 491.22, 494.1, 510.0, 510.9, 511.1, 513.0, 513.1, 519.01, 997.31                                             |
| Septicemia/bacteremia        | 003.1, 031.2, 036.2, 038.0, 038.10, 038.11, 038.12, 038.19, 038.2, 038.3,                                                                                                                                                                                                                                                                                                                                                                                         |

|                          |                                                                                                                                                                                                                                                                         |
|--------------------------|-------------------------------------------------------------------------------------------------------------------------------------------------------------------------------------------------------------------------------------------------------------------------|
|                          | 038.40, 038.41, 038.42, 038.43, 038.44, 038.49, 038.8, 038.9, 040.82, 785.52, 790.7, 995.90, 995.91, 995.92                                                                                                                                                             |
| Skin/soft tissue/muscle  | 031.1, 035, 040.0, 091.3, 567.31, 614.4, 680.0, 680.2, 680.3, 680.5, 680.6, 680.8, 680.9, 681.01, 681.10, 681.9, 682.0, 682.1, 682.2, 682.3, 682.4, 682.5, 682.6, 682.7, 682.8, 682.9, 685.0, 686.09, 686.8, 686.9, 695.81, 728.0, 728.86, 785.4, 958.3, 997.62, 998.51 |
| Spleen/lymph nodes       | 017.20, 017.22, 017.24, 683                                                                                                                                                                                                                                             |
| Tuberculosis NOS/miliary | 017.90, 017.94, 018.83, 018.90, 018.94                                                                                                                                                                                                                                  |
| Other                    | 996.60, 999.39, 996.69                                                                                                                                                                                                                                                  |
|                          |                                                                                                                                                                                                                                                                         |
| <b>Iron Product</b>      | <b>HCPCS Codes</b>                                                                                                                                                                                                                                                      |
| Iron sucrose             | J1756                                                                                                                                                                                                                                                                   |
| Sodium ferric gluconate  | J2916                                                                                                                                                                                                                                                                   |
| Ferumoxytol              | Q0138, Q0139                                                                                                                                                                                                                                                            |
| Iron dextran             | J1750                                                                                                                                                                                                                                                                   |

**Supplemental Table 2: Infected Organ System by Receipt of Intravenous Iron**

| <b>Infected Organ System</b> | <b>Intravenous Iron<br/>Received (n=2463)</b> | <b>No Intravenous Iron<br/>Received (n=20,357)</b> | <b>P Value<sup>a</sup></b> |
|------------------------------|-----------------------------------------------|----------------------------------------------------|----------------------------|
| Septicemia/bacteremia        | 29.3                                          | 30.8                                               | 0.11                       |
| Catheter/graft               | 32.9                                          | 27.0                                               | <0.001                     |
| Skin/soft tissue/muscle      | 10.4                                          | 11.2                                               | 0.25                       |
| GI/peritonitis               | 8.12                                          | 12.0                                               | <0.001                     |
| Respiratory/thoracic         | 7.15                                          | 6.87                                               | 0.61                       |
| Genitourinary                | 6.98                                          | 6.54                                               | 0.40                       |
| Joint/bone                   | 3.00                                          | 2.86                                               | 0.69                       |
| Cardiovascular               | 1.14                                          | 1.37                                               | 0.35                       |
| ENT/dental                   | 0.45                                          | 0.54                                               | 0.57                       |
| Other                        | 0.16                                          | 0.38                                               | 0.11                       |
| Reproductive/breast          | 0.24                                          | 0.21                                               | 0.74                       |
| CNS                          | 0.16                                          | 0.22                                               | 0.82                       |
| Tuberculosis (NOS, miliary)  | 0.04                                          | 0                                                  | 0.11                       |
| Spleen/lymph nodes           | 0                                             | 0                                                  | 1.00                       |

Data are presented as percentages.

<sup>a</sup>Comparisons performed with the chi-squared test and Fisher's exact test as appropriate.

**Supplemental Table 3: Associations between Receipt of Intravenous Iron and Adverse Outcomes****Excluding Patients with Receipt of Intravenous Iron within the Week Prior to Admission**

| <b>Outcome</b>                                                                            | <b>Estimated Adjusted Association<br/>or Length of Stay</b> | <b>P Value</b> |
|-------------------------------------------------------------------------------------------|-------------------------------------------------------------|----------------|
| All-cause mortality within 30 d of admission <sup>a</sup>                                 | 0.75 (0.55 to 1.04)                                         | 0.08           |
| All-cause 2010 mortality <sup>b</sup>                                                     | 1.01 (0.86 to 1.19)                                         | 0.93           |
| Mean length of stay, d                                                                    | 9.8 (9.0 to 10.6) versus 10.5 (10.1 to 10.9)                | 0.17           |
| Readmission for infection or all-cause mortality<br>within 30 d of discharge <sup>a</sup> | 1.17 (0.91 to 1.50)                                         | 0.22           |

Estimated adjusted association and length of stay data are presented with 95% confidence intervals. Results show the comparison of receipt versus no receipt of intravenous iron adjusted for age, duration of ESRD, sex, race, geographic location of ESRD network, coronary artery disease, other cardiac disease, congestive heart failure, hypertension, peripheral vascular disease, diabetes mellitus, cerebrovascular disease, cancer, chronic obstructive pulmonary disease, alcohol dependence, drug dependence, and tobacco use and the infected organ system.

<sup>a</sup>Odds ratio.

<sup>b</sup>Hazard ratio.

**Supplemental Table 4: Associations between Receipt of Intravenous Iron and Adverse Outcomes among Patients Hospitalized for Catheter/Graft Infections**

| Outcome                                                                                | Estimated Adjusted Association<br>or Length of Stay | P Value |
|----------------------------------------------------------------------------------------|-----------------------------------------------------|---------|
| All-cause mortality within 30 d of admission <sup>a</sup>                              | 0.83 (0.61 to 1.12)                                 | 0.22    |
| All-cause 2010 mortality <sup>b</sup>                                                  | 0.90 (0.78 to 1.06)                                 | 0.21    |
| Mean length of stay, d                                                                 | 9.6 (9.0 to 10.1) versus 10.6 (10.3 to 10.9)        | 0.001   |
| Readmission for infection or all-cause mortality within 30 d of discharge <sup>a</sup> | 0.79 (0.63 to 1.01)                                 | 0.06    |

Estimated adjusted association and length of stay data are presented with 95% confidence intervals. Results show the comparison of receipt versus no receipt of intravenous iron adjusted for age, duration of ESRD, sex, race, geographic location of ESRD network, coronary artery disease, other cardiac disease, congestive heart failure, hypertension, peripheral vascular disease, diabetes mellitus, cerebrovascular disease, cancer, chronic obstructive pulmonary disease, alcohol dependence, drug dependence, and tobacco use and the infected organ system.

<sup>a</sup>Odds ratio.

<sup>b</sup>Hazard ratio.

**Supplemental Table 5: Associations between Receipt of Intravenous Iron and Adverse Outcomes among Patients Hospitalized for Septicemia/Bacteremia**

| <b>Outcome</b>                                                                         | <b>Estimated Adjusted Association<br/>or Length of Stay</b> | <b>P Value</b> |
|----------------------------------------------------------------------------------------|-------------------------------------------------------------|----------------|
| All-cause mortality within 30 d of admission <sup>a</sup>                              | 0.88 (0.72 to 1.06)                                         | 0.19           |
| All-cause 2010 mortality <sup>b</sup>                                                  | 0.94 (0.84 to 1.06)                                         | 0.33           |
| Mean length of stay, d                                                                 | 11.4 (10.6 to 12.3) versus 12.5 (12.1 to 12.8)              | 0.03           |
| Readmission for infection or all-cause mortality within 30 d of discharge <sup>a</sup> | 1.28 (1.05 to 1.56)                                         | 0.01           |

Estimated adjusted association and length of stay data are presented with 95% confidence intervals. Results show the comparison of receipt versus no receipt of intravenous iron adjusted for age, duration of ESRD, sex, race, geographic location of ESRD network, coronary artery disease, other cardiac disease, congestive heart failure, hypertension, peripheral vascular disease, diabetes mellitus, cerebrovascular disease, cancer, chronic obstructive pulmonary disease, alcohol dependence, drug dependence, and tobacco use and the infected organ system.

<sup>a</sup>Odds ratio.

<sup>b</sup>Hazard ratio.
